# Supplementary material
Source: PubMed Central journal article supplement (PMC1175010)

# Aro4p

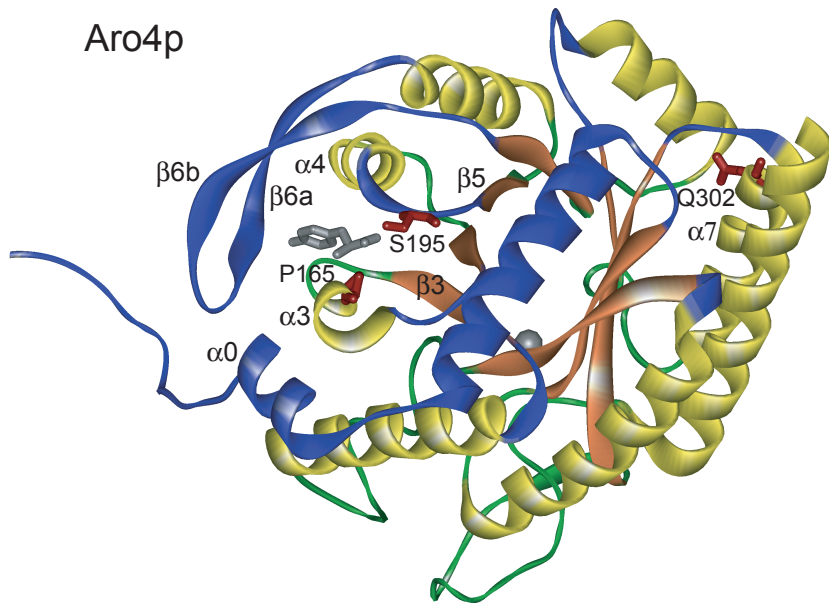

Supplement: pnas_0504238102_1.pdf [file pnas_0504238102_1.pdf]
